# Supplementary material for: What would dense atmospheric observation networks bring to the quantification of city CO 2 emissions?
Source: Copernicus journal article supplement (doi:10.5194/acp-16-7743-2016), 2016-06-24
Supplement: Supplementary file 1 [file acp-16-7743-2016-supplement.pdf]

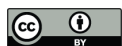

*Supplement of*

## **What would dense atmospheric observation networks bring to the quantification of city CO<sub>2</sub> emissions?**

**Lin Wu et al.**

*Correspondence to:* Lin Wu ([lwu@lsce.ipsl.fr](mailto:lwu@lsce.ipsl.fr))

The copyright of individual parts of the supplement might differ from the CC-BY 3.0 licence.

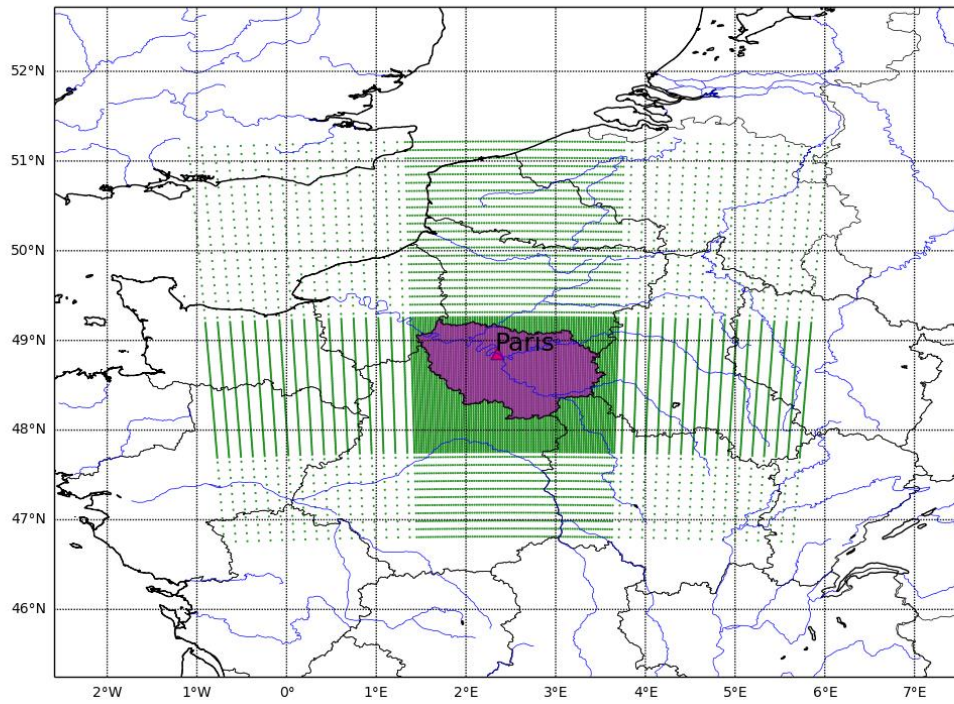

1 Supplementary Figure S1 Domain of inversion in our study. The triangle in red marks out a  
 2 point in central Paris, the central area in magenta shows the IDF region, and the green dots  
 3 show the CHIMERE model grid at 2 km resolution for the central area covering IDF and its  
 4 vicinity and at 2 km × 10 km to 10 km × 10 km resolution over the rest of the domain.
